# Supplementary material for: Fucoxanthin, A Carotenoid Derived from Phaeodactylum tricornutum Exerts Antiproliferative and Antioxidant Activities In Vitro
Source: PubMed Central journal article supplement (PMC6617271; doi:10.3390/antiox8060183), 2019-06-19
Supplement: antioxidants-08-00183-s001.pdf [file antioxidants-08-00183-s001.pdf]

Article

# Fucoxanthin, A Carotenoid Derived from *Phaeodactylum tricornutum* Exerts Antiproliferative and Antioxidant Activities In Vitro

Ulrike Neumann <sup>1,†</sup>, Felix Derwenskus <sup>2,3,†</sup>, Verena Flaiz Flister <sup>1</sup>, Ulrike Schmid-Staiger <sup>2</sup>, Thomas Hirth <sup>4</sup> and Stephan C. Bischoff <sup>1,\*</sup>

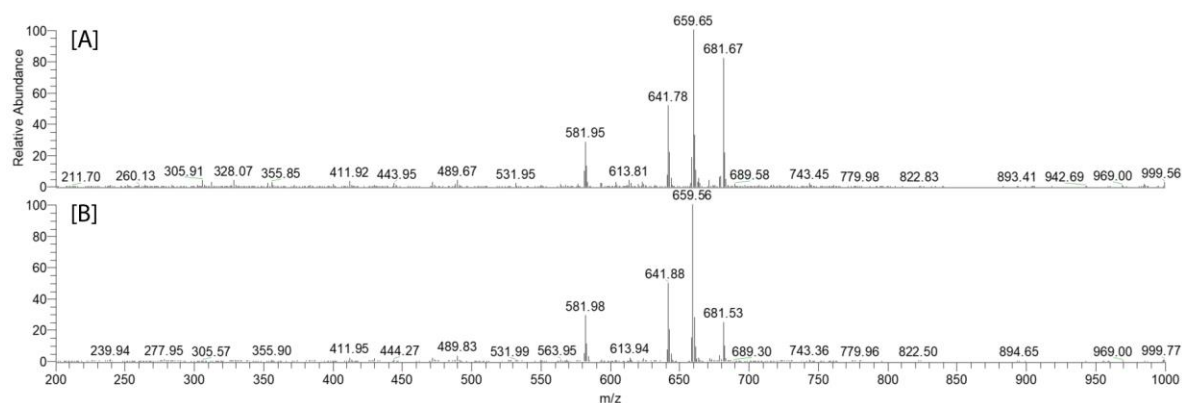

**Figure S1.** UHPLC-MS spectra of a commercial fucoxanthin standard (**A**) and fucoxanthin derived from the diatom *P. tricornutum* (**B**) showing the specific  $m/z$ -values of precursor ions ( $m/z = 659.6$  [M+H]<sup>+</sup>;  $681.5$  [M+Na]<sup>+</sup>) of fucoxanthin and related daughter ions ( $m/z = 641,8$  and  $581,9$ ). Abbreviations:  $m/z$  mass-to-charge ratio.
